# Supplementary material
Source: PubMed Central journal article supplement (PMC6209109)
Supplement: NIHMS989841-supplement-SI.pdf [file NIHMS989841-supplement-SI.pdf]

# Supporting Information

## Mechanism of Permanganate Promoted Dihydroxylation of Complex Diketopiperazines: Critical Roles of Counter-Cation and Ion-Pairing

Brandon E. Haines‡, Brandon M. Nelson†, Jessica M Grandner§, Justin Kim†, K. N. Houk§\*, Mohammad Movassaghi†\*, and Djamaladdin G. Musaev‡\*

‡ *Cherry L. Emerson Center for Scientific Computation and Department of Chemistry, Emory University, Atlanta, Georgia 30322, United States*

† *Department of Chemistry, Massachusetts Institute of Technology, Cambridge, Massachusetts 02139, United States*

§ *Department of Chemistry and Biochemistry, University of California, Los Angeles, California 90095-1569, United States*

Email: [dmusaev@emory.edu](mailto:dmusaev@emory.edu), [movassag@mit.edu](mailto:movassag@mit.edu), [houk@ucla.edu](mailto:houk@ucla.edu)

### Table of Contents

|                                                                                                                 |     |
|-----------------------------------------------------------------------------------------------------------------|-----|
| 1. Supplementary data for the permanganate ion .....                                                            | S2  |
| 2. Supplementary data for oxidation of <b>I</b> .....                                                           | S5  |
| 3. Supplementary data for oxidation of <b>II</b> .....                                                          | S9  |
| 4. Supplementary Data for Oxidation of <b>III</b> .....                                                         | S10 |
| 5. Energies for Calculated Structures .....                                                                     | S11 |
| 6. Contour plot and (b) electrostatic potential map of the <b>I_3_2N</b> and <b>I_3_2M1</b> intermediate, ..... | S17 |
| 7. References .....                                                                                             | S17 |

# 1. Supplementary data for the permanganate ion

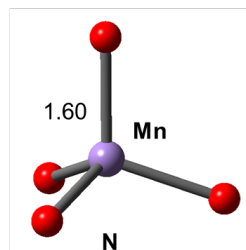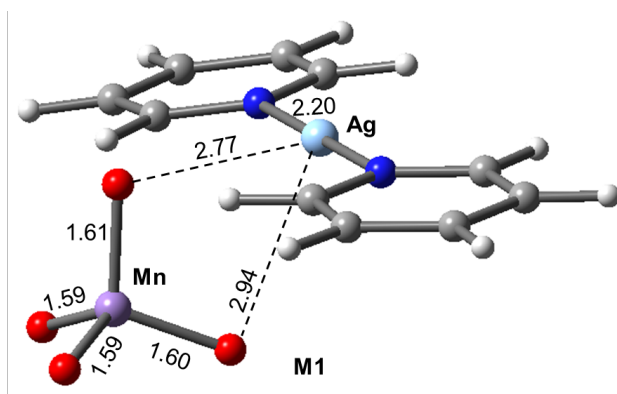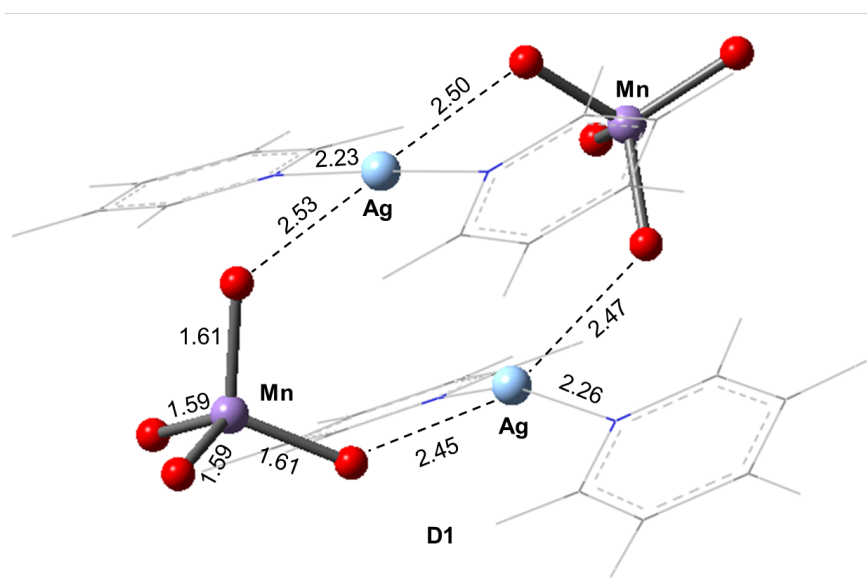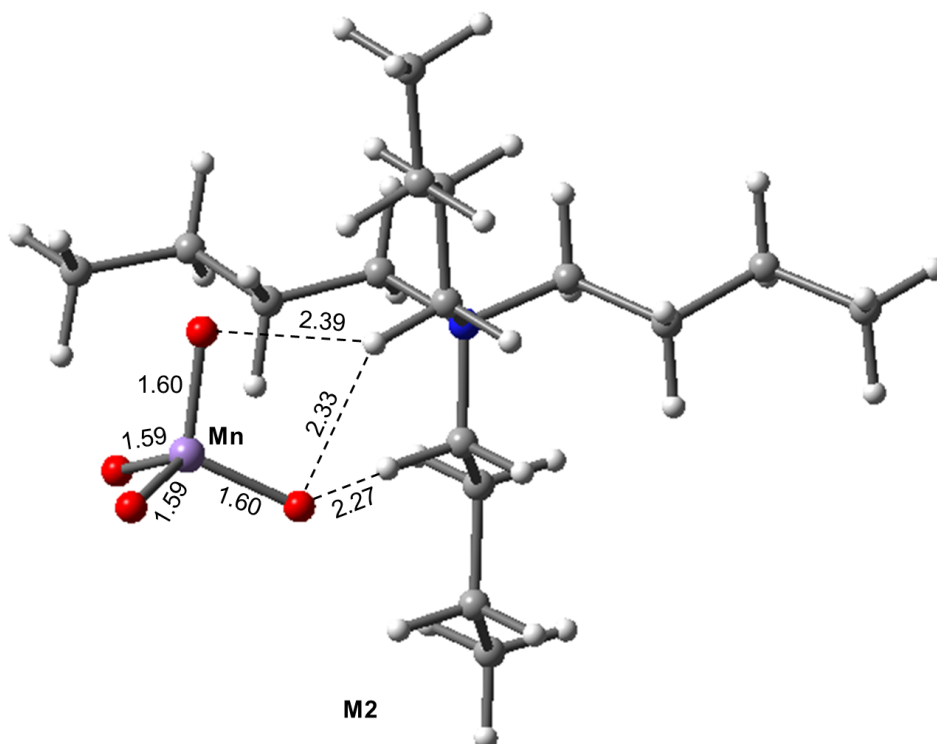

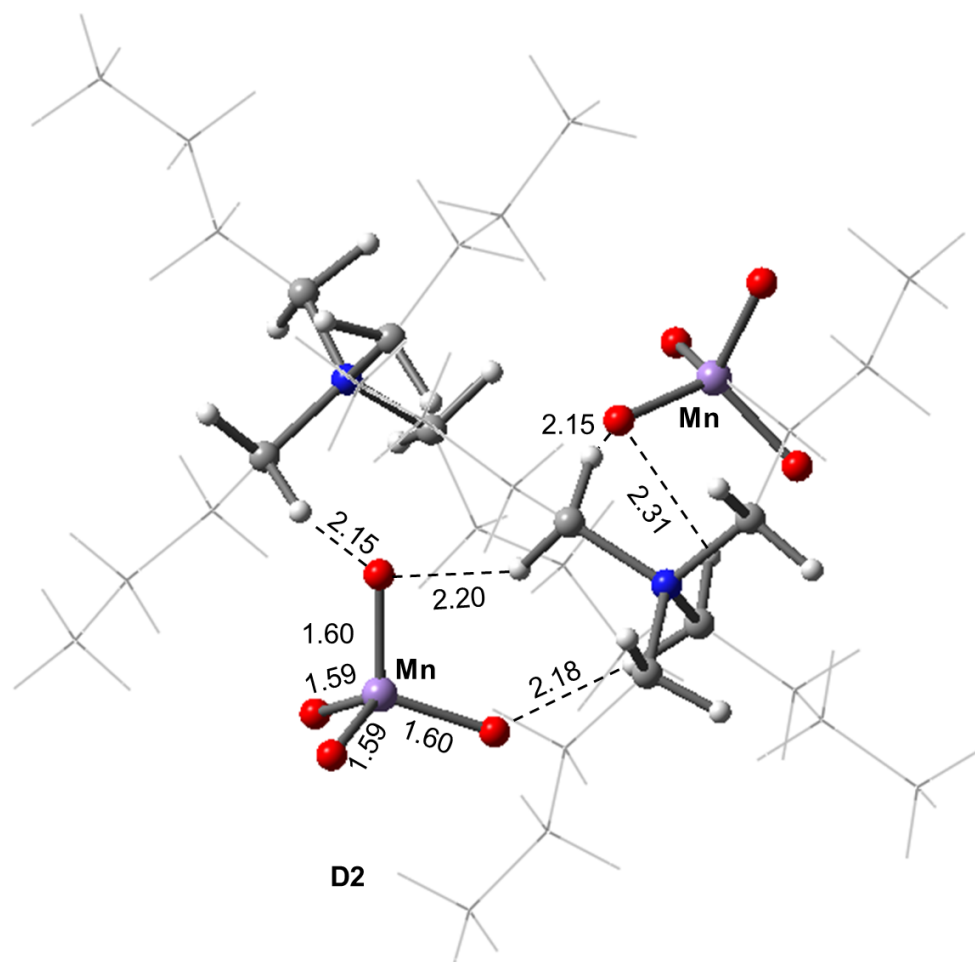

**Figure S1.** Optimized geometries for the model oxidants used in this study: **N**, **M1**, **D1**, **M2**, and **D2**. Bond distances are in Å.

In general, the ground electronic state of the permanganate ion ( $\text{MnO}_4^-$ ) is well described as a closed shell singlet and the excited triplet states are very high in energy ( $\sim 51$  kcal/mol experimentally).<sup>1</sup> Popular DFT methods are known to underestimate the singlet-triplet energy splitting for first-row transition metal complexes<sup>2-3</sup> and more specifically the permanganate ion due to some multi-reference character in the ground state. We computed the singlet-triplet energy difference (from optimized structures at each level of theory) with hybrid (B3LYP, M06, wB97XD) and pure (BLYP, M06-L) density functionals with two basis sets, BS1 = LANL2DZ for Mn (with ECP) and 6-31g(d,p) for O and BS2 = 6-311+g(d,p) for Mn and O, to assess their performance in replicating the singlet-triplet energy splitting. (Table S1) We find that all of the methods examined here underestimate the singlet-triplet energy splitting and we find a wide range of values,  $\Delta E = 17.6$ - $35.2$  kcal/mol. With the expectation that computed barriers involving the closed shell singlet and triplet states will be underestimated, we chose the B3LYP-D3BJ/BS1 level of theory with an empirical dispersion correction and implicit solvation model (PCM with dichloromethane as the solvent) and focus on relative trends in reactivity.

**Table S1.** The singlet-triplet energy difference the permanganate ion ( $\text{MnO}_4^-$ ) with the B3LYP, M06, wB97XD, BLYP, and M06-L density functionals in conjunction with two basis sets (BSN), BS1 = LANL2DZ for Mn (with ECP) and 6-31g(d,p) for O and BS2 = 6-311+g(d,p) for Mn and O, to assess their performance in replicating the singlet-triplet energy splitting

| DFT                      | BSN, where<br>N = 1,2 | $E_{\text{CSS}}$ (hartree) | $E_{\text{T}}$<br>(hartree) | $\Delta E$<br>(kcal/mol) |
|--------------------------|-----------------------|----------------------------|-----------------------------|--------------------------|
| B3LYP                    | 1                     | -404.808733                | -404.777679                 | <b>19.5</b>              |
| B3LYP                    | 2                     | -1452.026918               | -1451.993848                | <b>20.8</b>              |
| B3LYP-D3BJ               | 1                     | -404.810870                | -404.779853                 | <b>19.5</b>              |
| B3LYP-D3BJ,<br>PCM = DCM | 1                     | -404.889894                | -404.858777                 | <b>19.5</b>              |
| M06                      | 1                     | -404.675444                | -404.630697                 | <b>28.1</b>              |
| M06                      | 2                     | -1451.782316               | -1451.741596                | <b>25.6</b>              |
| wB97XD                   | 1                     | -404.652663                | -404.624552                 | <b>17.6</b>              |
| wB97XD                   | 2                     | -1451.863337               | -1451.835271                | <b>17.6</b>              |
| BLYP                     | 1                     | -404.849881                | -404.795620                 | <b>34.0</b>              |
| BLYP                     | 2                     | -1452.159189               | -1452.103055                | <b>35.2</b>              |
| M06-L                    | 1                     | -404.889796                | -404.837247                 | <b>33.0</b>              |
| M06-L                    | 2                     | -1451.972304               | -1451.920615                | <b>32.4</b>              |

## 2. Supplementary data for oxidation of I

The structural features and BDEs of the full dimeric diketopiperazine substrate (+)-3 and model substrate **I** are generally consistent. (see Figure S2 and provided cartesian coordinates of these molecules)

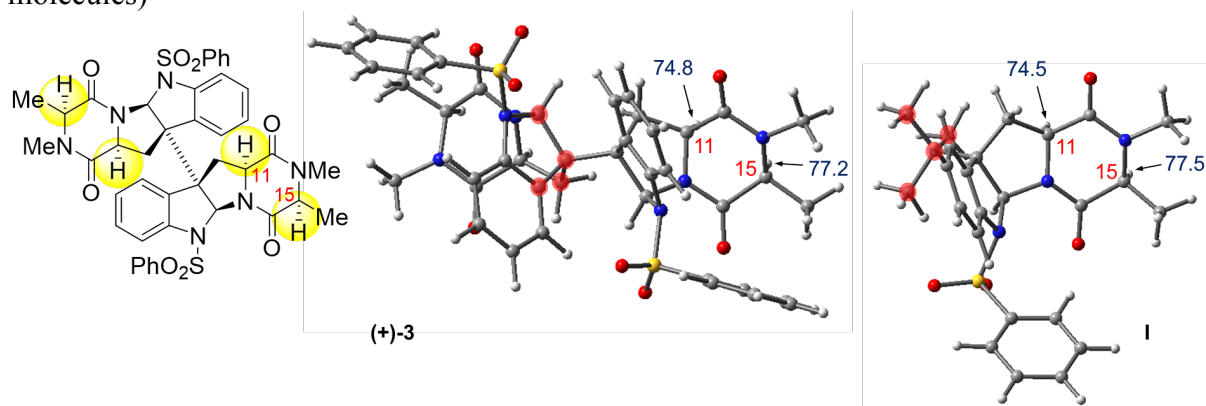

**Figure S2.** Comparison of the optimized structure of (+)-3 and model substrate **I**. Computed bond dissociation energies (BDEs) are shown in blue and reported in kcal/mol.

The computed free barrier for interconversion of the permanganate ester (**I-3-N**) and alcohol (**I-3'-N**) intermediates through transition state **I-3TS''-N** is 34.3 kcal/mol (Figure S3). This is high enough to suggest that this process is unlikely to occur to any significant degree.

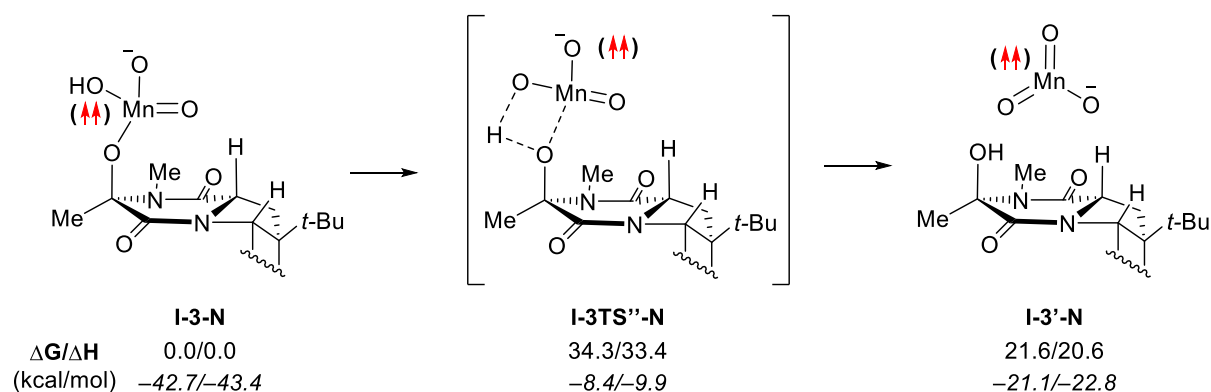

**Figure S3.** Computed energies for the interconversion of the permanganate ester (**I-3-N**) and alcohol (**I-3'-N**) intermediates through transition state **I-3TS''-N**. Energies are calculated relative to **I-3-N** (and from **I-2-N** in italics) and are given as  $\Delta G/\Delta H$  in kcal/mol.

Presented in Figures S4-S7 are the computational data obtained for the reaction pathways following the first C–H abstraction of **I** by the permanganate ion starting at C<sup>11</sup>. These data are consistent with the data for the pathways starting at C<sup>15</sup> that are presented in the main text.

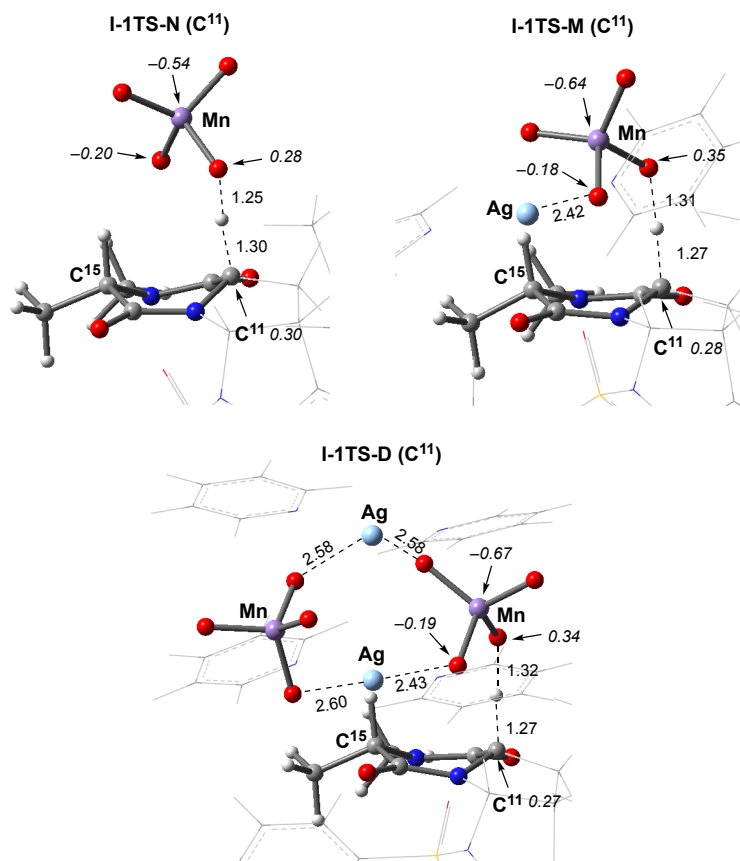

**Figure S4.** Optimized transition states for C–H abstraction at C<sup>11</sup> (**I-1TS-X**) using the **N**, **M1**, and **D1** model oxidants. Bond distances are in Å and Mulliken spin density values in  $|e|$  are shown in italics.

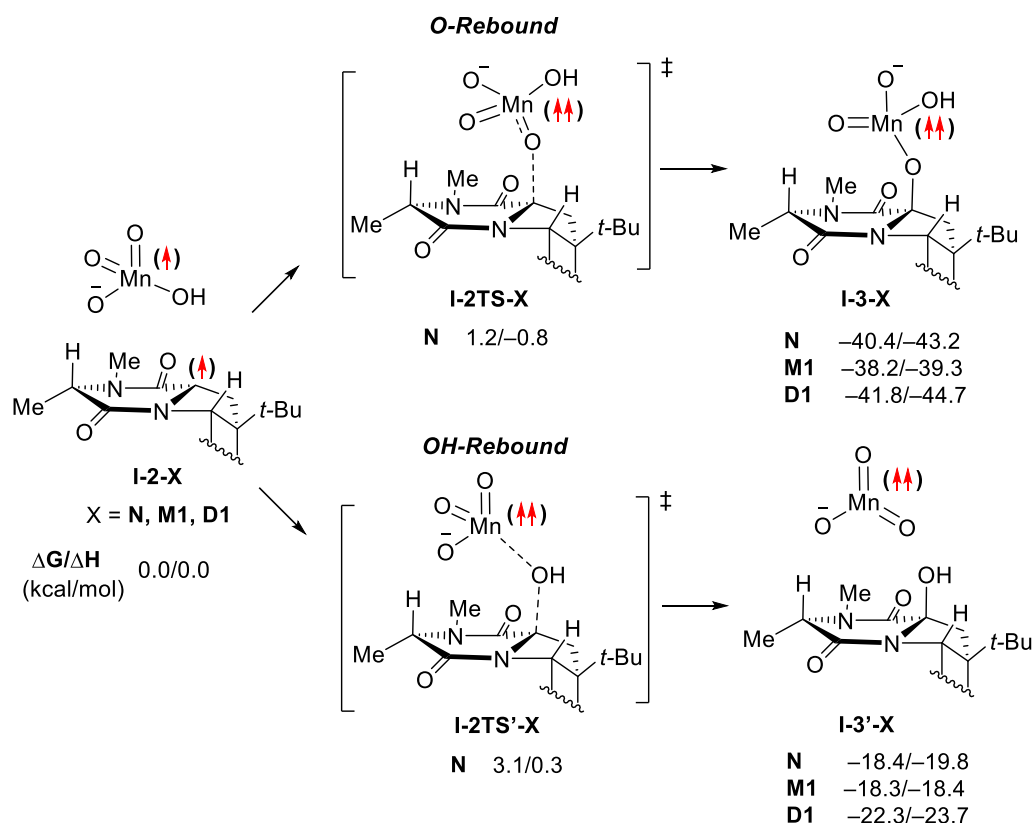

**Figure S5.** The examined O-rebound and OH-rebound pathways starting from oxidation at C<sup>11</sup>. Energies are calculated relative to **I-2-X** and are given as  $\Delta G/\Delta H$  in kcal/mol. For sake of simplicity, here the schematic reaction pathway was shown only for model oxidant without counter-cation, i.e. for X = N.

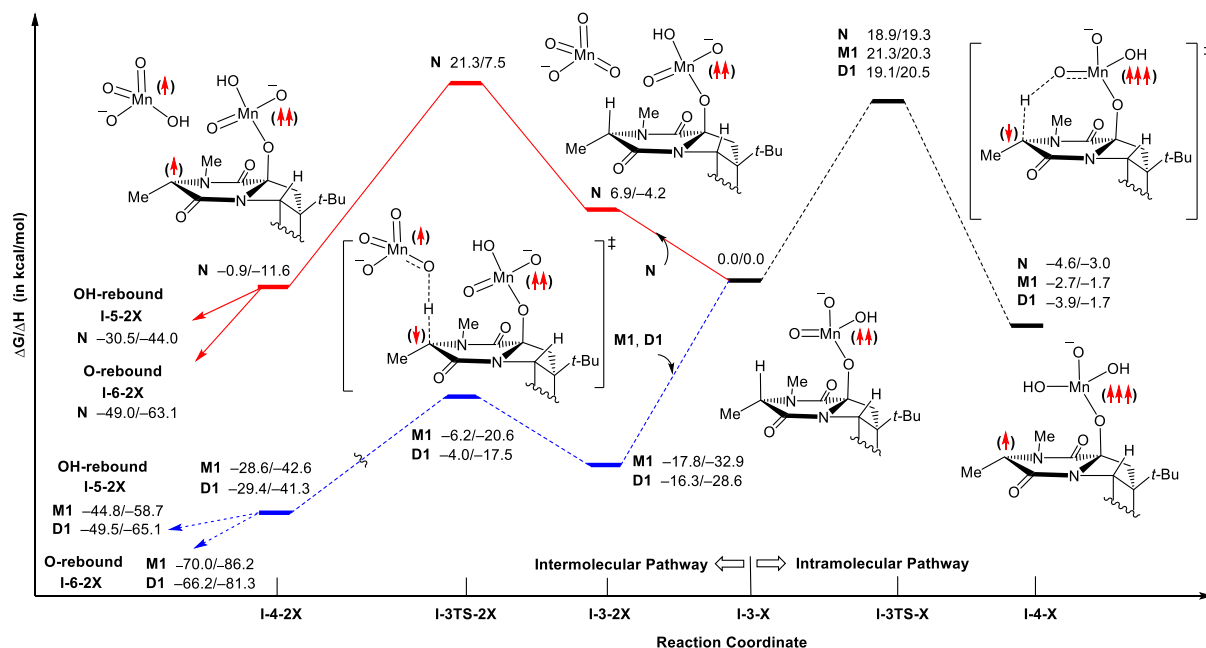

**Figure S6.** Schematic presentation intramolecular and intermolecular pathways of the C-H abstraction at the C<sup>15</sup> position of the C<sup>11</sup> permanganate intermediate **I-3-X** (i.e. the second C-H oxidation). All energies are calculated relative to the **I-3-X** + X dissociation limit. For simplicity, only the structures with N are depicted

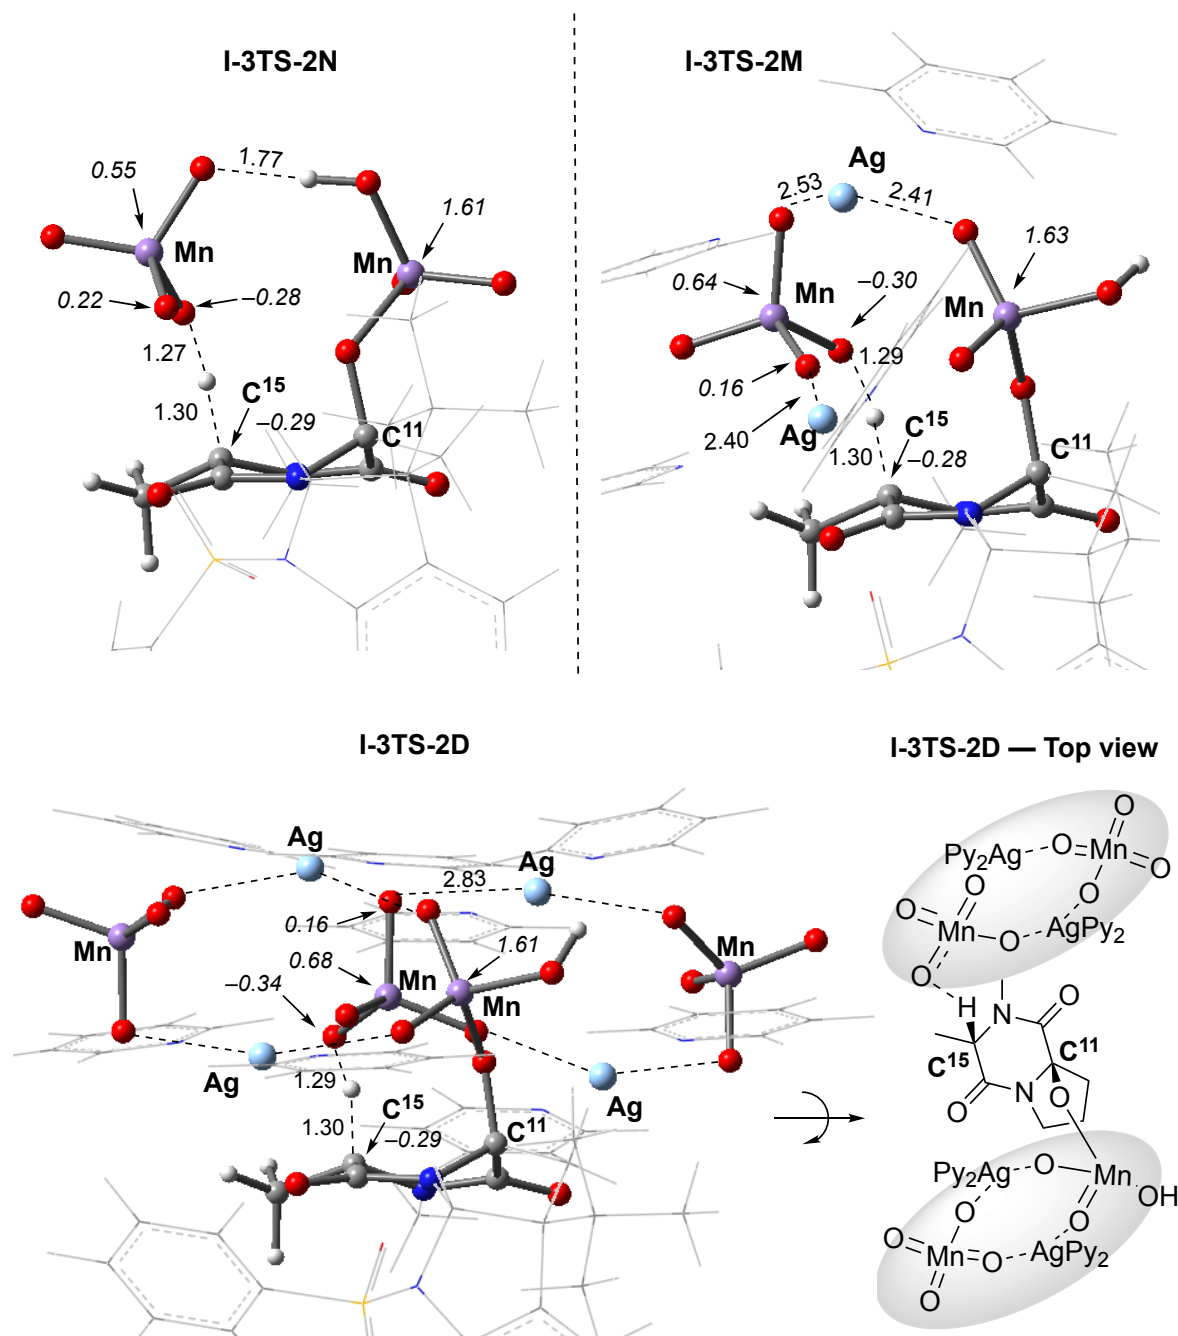

**Figure S7.** Optimized transition state structures for the second C–H abstraction through the intermolecular pathway (**I-3TS-2X**) starting from C<sup>11</sup> for the model oxidants **N**, **M1**, and **D1**. Bond distances (in Å) and Mulliken spin density values (in |e|) are shown in italics. Some parts of the counter-cations have been removed from the visual representation for clarity.



### 3. Supplementary data for oxidation of II

**Table S2.** The calculated BDEs and energies for C–H abstraction at the C<sup>11</sup> and C<sup>15</sup> positions of **II** with model oxidants **N**, **M1**, and **D1**. For sake of simplicity, here the schematic reaction pathway is shown only for model oxidant **N** and for the C<sup>11</sup>–H oxidation

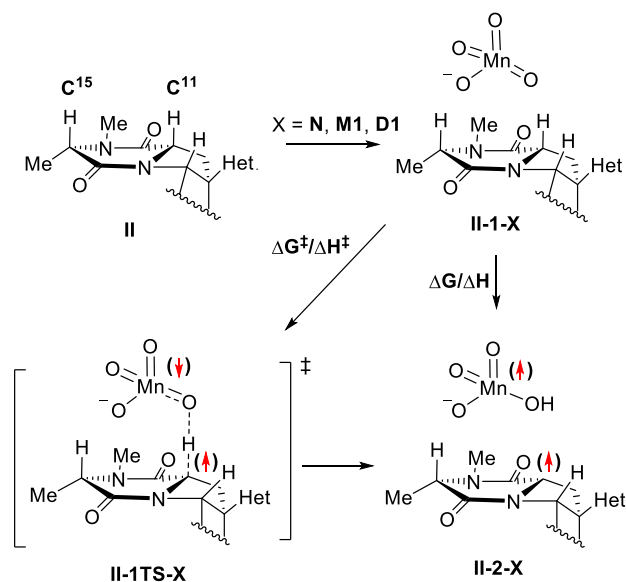

|           | C <sup>11</sup> , BDE = 75.6 kcal/mol |             | C <sup>15</sup> , BDE = 78.3 kcal/mol |           |
|-----------|---------------------------------------|-------------|---------------------------------------|-----------|
| Ox.       | ΔG <sup>‡</sup> /ΔH <sup>‡</sup>      | ΔG/ΔH       | ΔG <sup>‡</sup> /ΔH <sup>‡</sup>      | ΔG/ΔH     |
| <b>N</b>  | 12.3/12.6                             | −10.3/−9.0  | 11.6/11.4                             | −4.7/−2.5 |
| <b>M1</b> | 11.9/11.6                             | −11.7/−11.2 | 10.1/9.2                              | −8.8/−5.2 |
| <b>D1</b> | 10.9/10.1                             | −10.9/−10.4 | 11.3/9.7                              | −6.5/−4.8 |

#### 4. Supplementary Data for Oxidation of III

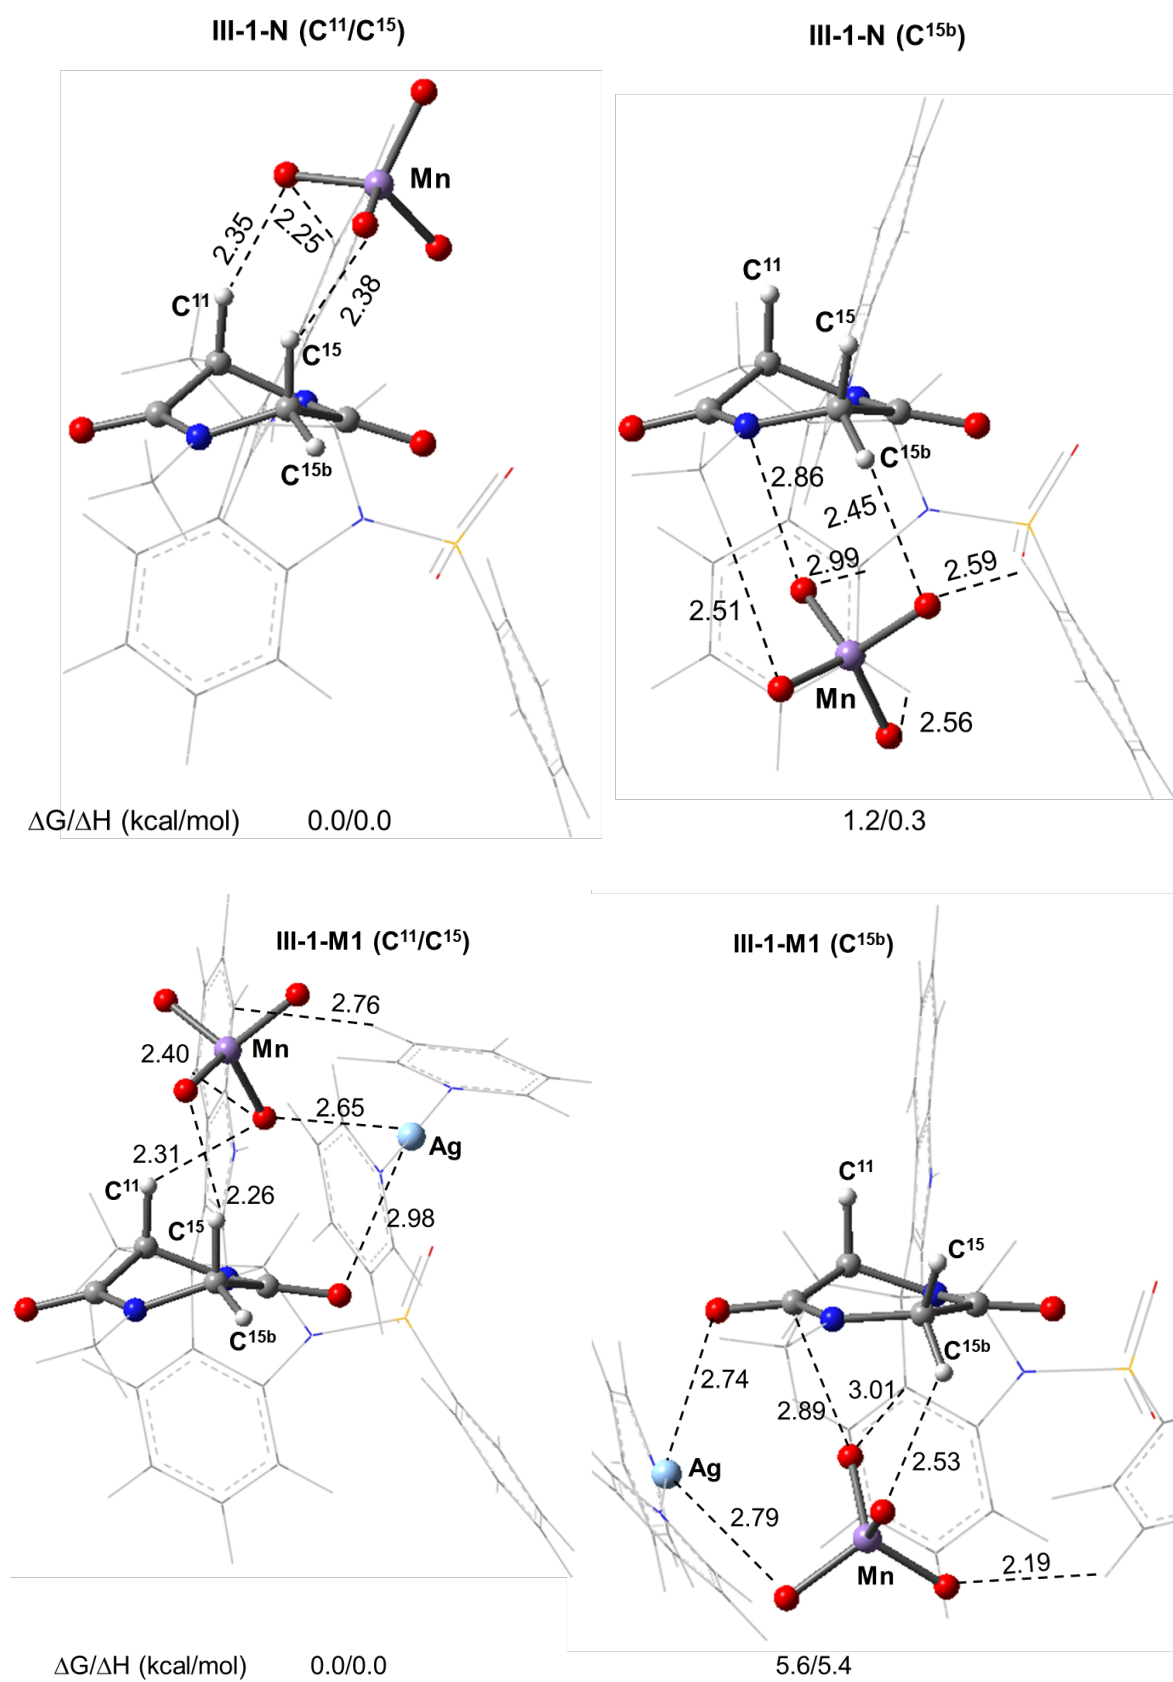

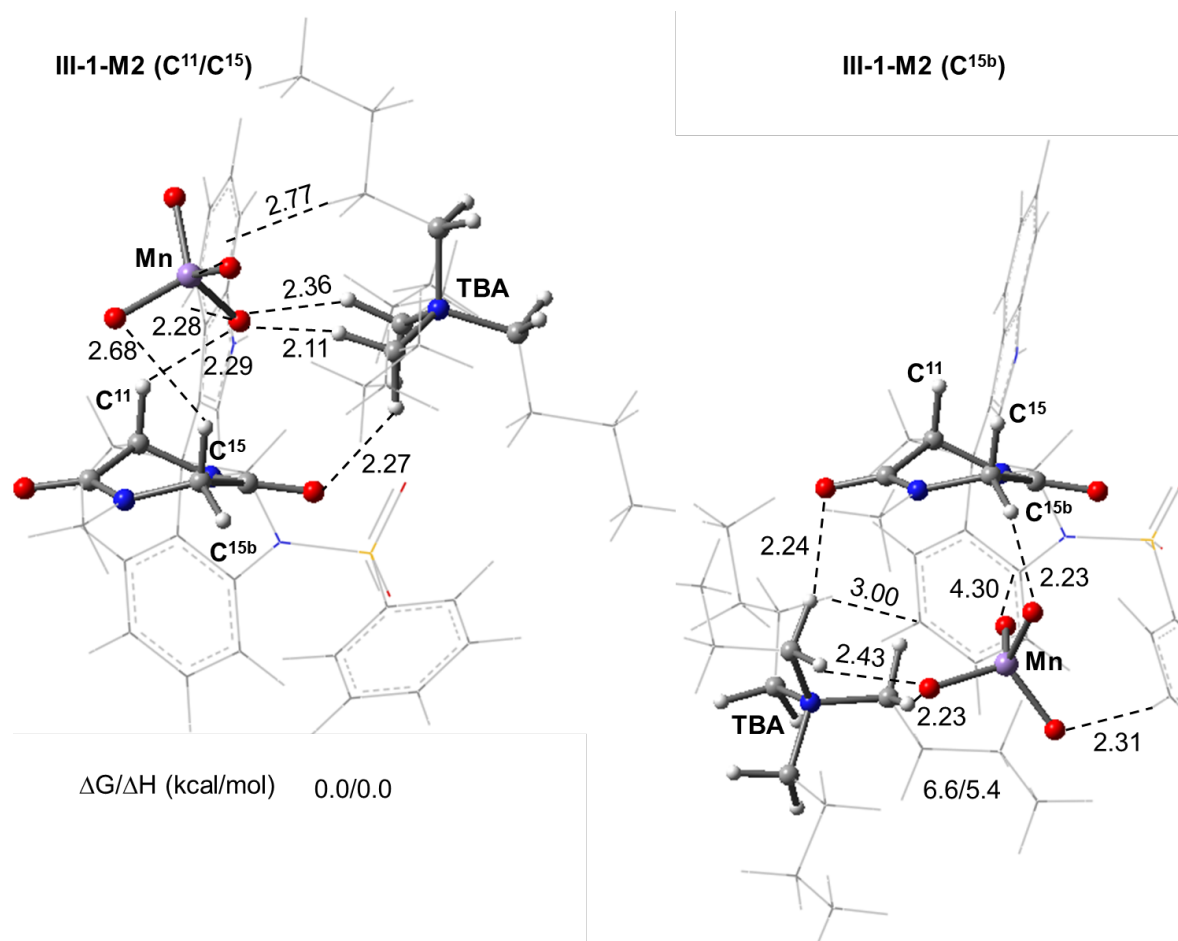

**Figure S8.** Optimized geometries for coordination of N, M1 and M2 to the C<sup>11</sup>/C<sup>15</sup> and C<sup>15b</sup> faces of **III** (**III-1-X**). Bond distances are in Å and  $\Delta G/\Delta H$  are in kcal/mol.

## 5. Energies for Calculated Structures

Geometry optimizations and frequency calculations were performed with the Gaussian 09 suite of programs<sup>4</sup> at the B3LYP-D3/[6-31G(d,p) + LanL2dz (Mn)] level of theory (called as B3LYP-D3/BS1) with the corresponding Hay-Wadt effective core potentials<sup>5-7</sup> for Mn and Grimme's empirical dispersion-correction for B3LYP ( $E_{BS1}$ ).<sup>8</sup> Frequency analysis is used to characterize each minimum with zero imaginary frequencies and each transition state (TS) structures with only one imaginary frequency ( $\nu_i$  in  $\text{cm}^{-1}$ ). Bulk solvent effects are incorporated in all calculations (optimization of geometries, frequency and energy calculations) at the self-consistent reaction field polarizable continuum model (IEF-PCM) level of theory and with dichloromethane (DCM) as the solvent.<sup>9-11</sup> The final electronic energies ( $E_{BS2}$ ) were re-computed at the B3LYP-D3/[6-311+G(d,p) + LANL2DZ (Mn)] level of theory (called as B3LYP-D3/BS2) by utilizing the geometries optimized at the B3LYP-D3/BS1 level. Thermal corrections for the free energy (G) and enthalpy (H) were calculated at the B3LYP-D3/BS1 level of theory and corrected to a solution standard state of 1M at 298.15 K.<sup>12</sup> These corrections were then applied to the energies calculated at the B3LYP-D3/BS2 level to afford the free energy and enthalpy values discussed in the text.

**Table S3.** Computed energies in hartree and vibrational frequency analysis for oxidant species and associated structures. (CSS = closed shell singlet, OSS = open shell singlet, D = doublet, T = triplet, Q = quintet)

| Structure                  | E <sub>BS1</sub> | E <sub>BS2</sub> | H        | G         | <S <sup>2</sup> > | $\nu_i$ (cm <sup>-1</sup> ) |
|----------------------------|------------------|------------------|----------|-----------|-------------------|-----------------------------|
| <b>N-CSS</b>               | -404.889880      | -404.989946      | 0.019081 | -0.011688 | -                 | -                           |
| <b>N-T</b>                 | -404.858935      | -404.963259      | 0.017774 | -0.015058 | 2.0311            | -                           |
| <b>Ag (Ag<sup>+</sup>)</b> | -642.286280      | -642.405354      | 0.194639 | 0.140402  | -                 | -                           |
| <b>M1-CSS</b>              | -1047.217090     | -1047.430098     | 0.215791 | 0.146083  | -                 | -                           |
| <b>M1-T</b>                | -1047.187842     | -1047.403654     | 0.214582 | 0.144671  | 2.0332            | -                           |
| <b>M1H-D</b>               | -1047.857185     | -1048.075910     | 0.226627 | 0.155720  | 0.7804            | -                           |
| <b>D1-CSS</b>              | -2094.499601     | -2094.917137     | 0.433299 | 0.320252  | -                 | -                           |
| <b>D1H-D</b>               | -2095.140079     | -2095.562499     | 0.443901 | 0.327212  | 0.7846            | -                           |
| <b>TBA<sup>+</sup></b>     | -686.104122      | -686.239771      | 0.532527 | 0.457413  | -                 | -                           |
| <b>M2-CSS</b>              | -1091.014839     | -1091.258111     | 0.553383 | 0.464190  | -                 | -                           |
| <b>M2-T</b>                | -1090.985597     | -1091.231129     | 0.552037 | 0.459605  | 2.0316            | -                           |
| <b>M2H-D</b>               | -1091.652767     | -1091.902392     | 0.564144 | 0.472564  | 0.7771            | -                           |
| <b>D2-CSS</b>              | -2182.084376     | -2182.561973     | 1.109634 | 0.953739  | -                 | -                           |
| <b>D2H-D</b>               | -2182.722592     | -2183.205931     | 1.120644 | 0.963700  | 0.7771            | -                           |
| <b>N'-CSS</b>              | -329.698012      | -329.780559      | 0.014111 | -0.015917 | -                 | -                           |
| <b>N'-OSS</b>              | -329.698055      | -329.780917      | 0.013785 | -0.016535 | 0.0828            | -                           |
| <b>N'-T</b>                | -329.692057      | -329.779080      | 0.013272 | -0.018876 | 2.0955            | -                           |
| <b>N'-Quintet</b>          | -329.653317      | -329.745500      | 0.012440 | -0.020968 | 6.0523            | -                           |
| <b>M1'-CSS</b>             | -972.025405      | -972.218020      | 0.210732 | 0.141128  | -                 | -                           |
| <b>M1'-OSS</b>             | -972.025975      | -972.218749      | 0.210482 | 0.140833  | 0.2906            | -                           |
| <b>M1'-T</b>               | -972.024993      | -972.218914      | 0.210023 | 0.141198  | 2.1125            | -                           |
| <b>M1''-Q</b>              | -1944.173485     | -1944.549793     | 0.423131 | 0.308763  | 6.0702            | -                           |
| Toluene                    | -271.587685      | -271.647864      | 0.135190 | 0.100430  | -                 | -                           |
| Toluene-D                  | -270.934533      | -270.995803      | 0.121442 | 0.088208  | 0.7832            | -                           |

**Table S4.** Computed energies in hartree and vibrational frequency analysis for the model substrates and associated structures. (CSS = closed shell singlet, OSS = open shell singlet, D = doublet, T = triplet, Q = quintet)

| Structure          | E <sub>BS1</sub> | E <sub>BS2</sub> | H        | G        | <S <sup>2</sup> > | v <sub>i</sub> (cm <sup>-1</sup> ) |
|--------------------|------------------|------------------|----------|----------|-------------------|------------------------------------|
| <b>I</b>           | -1833.575858     | -1833.941943     | 0.542008 | 0.454653 | -                 | -                                  |
| <b>I-C11-D</b>     | -1832.943375     | -1833.310009     | 0.528847 | 0.440327 | 0.7552            | -                                  |
| <b>I-C15-D</b>     | -1832.940258     | -1833.305249     | 0.528884 | 0.441692 | 0.7556            | -                                  |
| <b>I-C2-D</b>      | -1832.915593     | -1833.280808     | 0.528513 | 0.441505 | 0.7557            | -                                  |
| <b>I-C12-D</b>     | -1832.910448     | -1833.277334     | 0.527420 | 0.439583 | 0.7542            | -                                  |
| <b>I-C18-D</b>     | -1832.913735     | -1833.281528     | 0.527735 | 0.440115 | 0.7563            | -                                  |
| <b>I'-C11-OH</b>   | -1908.799078     | -1909.192229     | 0.547051 | 0.457532 | -                 | -                                  |
| <b>I'-C15-OH</b>   | -1908.766292     | -1909.190991     | 0.547325 | 0.458732 | -                 | -                                  |
| <b>I'' (diol)</b>  | -1983.996639     | -1984.446307     | 0.552718 | 0.462804 | -                 | -                                  |
| <b>(+)-3</b>       | -3351.393147     | -3352.058351     | 0.827013 | 0.697466 | -                 | -                                  |
| <b>(+)-3-C11-D</b> | -3350.759721     | -3351.425933     | 0.813736 | 0.681431 | 0.7552            | -                                  |
| <b>(+)-3-C15-D</b> | -3350.758044     | -3351.422091     | 0.813854 | 0.683933 | 0.7572            | -                                  |
| <b>II</b>          | -2038.949923     | -2039.365714     | 0.540693 | 0.448376 | -                 | -                                  |
| <b>II-C11-D</b>    | -2038.314852     | -2038.731670     | 0.527194 | 0.432789 | 0.7553            | -                                  |
| <b>II-C15-D</b>    | -2038.312579     | -2038.727574     | 0.527396 | 0.434310 | 0.7564            | -                                  |
| <b>III</b>         | -1999.628564     | -2000.038117     | 0.510874 | 0.421880 | -                 | -                                  |
| <b>III-C11-D</b>   | -1998.990936     | -1999.400433     | 0.497448 | 0.405895 | 0.7549            | -                                  |
| <b>III-C15-D</b>   | -1998.984922     | -1999.394191     | 0.497699 | 0.407146 | 0.7568            | -                                  |

**Table S5.** Computed energies in hartree and vibrational frequency analysis for the first C–H abstraction at C<sup>11</sup> of **I** with **N**, **M1**, and **D1** and associated structures. (CSS = closed shell singlet, OSS = open shell singlet, D = doublet, T = triplet, Q = quintet)

| Structure           | E <sub>BS1</sub> | E <sub>BS2</sub> | H        | G        | <S <sup>2</sup> > | v <sub>i</sub> (cm <sup>-1</sup> ) |
|---------------------|------------------|------------------|----------|----------|-------------------|------------------------------------|
| <b>I-1-N-CSS</b>    | -2238.462427     | -2238.954826     | 0.563757 | 0.462250 | -                 | -                                  |
| <b>I-1TS-N-CSS</b>  | -2238.424754     | -2238.919951     | 0.556612 | 0.456921 | -                 | 512.8i                             |
| <b>I-3-N-CSS</b>    | -2238.522544     | -2239.021962     | 0.563049 | 0.465821 | -                 | -                                  |
| <b>I-1TS-N-OSS</b>  | -2238.434090     | -2238.928213     | 0.556335 | 0.455980 | 0.6323            | 1797.2i                            |
| <b>I-2-N-OSS</b>    | -2238.469796     | -2238.967388     | 0.561063 | 0.457329 | 1.0262            | -                                  |
| <b>I-2TS-N-OSS</b>  | -2238.465574     | -2238.964322     | 0.560011 | 0.459922 | 0.7721            | 541.8i                             |
| <b>I-3-N-OSS</b>    | -2238.526410     | -2239.026980     | 0.562339 | 0.462944 | 0.6432            | -                                  |
| <b>I-2TS'-N-OSS</b> | -2238.451171     | -2238.953972     | 0.558690 | 0.459350 | 1.0309            | 927.1i                             |
| <b>I-3'-N-OSS</b>   | -2238.497867     | -2238.998795     | 0.563075 | 0.460010 | 0.3650            | -                                  |
| <b>I-1-N-T</b>      | -2238.431029     | -2238.925970     | 0.562596 | 0.460891 | 2.032             | -                                  |
| <b>I-1TS-N-T</b>    | -2238.423985     | -2238.919449     | 0.558035 | 0.457584 | 2.0353            | 252.1i                             |
| <b>I-2-N-T</b>      | -2238.469747     | -2238.967290     | 0.561020 | 0.455693 | 2.0318            | -                                  |
| <b>I-2TS-N-T</b>    | -2238.468419     | -2238.967256     | 0.559673 | 0.457606 | 2.0781            | 357.8i                             |
| <b>I-3-N-T</b>      | -2238.535541     | -2239.037450     | 0.562300 | 0.461542 | 2.0302            | -                                  |
| <b>I-2TS'-N-T</b>   | -2238.461808     | -2238.964917     | 0.559071 | 0.458301 | 2.0564            | 528.6i                             |
| <b>I-3'-N-T</b>     | -2238.498154     | -2239.000371     | 0.562574 | 0.459465 | 2.084             | -                                  |
| <b>I-1-M1-CSS</b>   | -2880.814320     | -2881.415496     | 0.760238 | 0.624979 | -                 | -                                  |
| <b>I-1TS-M1-OSS</b> | -2880.788034     | -2881.390773     | 0.753176 | 0.620484 | 0.6454            | 1480.1i                            |
| <b>I-2-M1-T</b>     | -2880.825255     | -2881.430179     | 0.757974 | 0.622403 | 2.0312            | -                                  |
| <b>I-3-M1-T</b>     | -2880.887075     | -2881.494301     | 0.759459 | 0.625677 | 2.0332            | -                                  |
| <b>I-3'-M1-T</b>    | -2880.852196     | -2881.461330     | 0.759871 | 0.624357 | 2.08              | -                                  |
| <b>I-1-D1-CSS</b>   | -3928.100711     | -3928.906835     | 0.978398 | 0.800831 | -                 | -                                  |
| <b>I-1TS-D1-OSS</b> | -3928.073579     | -3928.881835     | 0.970948 | 0.792438 | 0.6445            | 1465.3i                            |
| <b>I-2-D1-T</b>     | -3928.102686     | -3928.915096     | 0.975492 | 0.793816 | 2.0379            | -                                  |
| <b>I-3-D1-T</b>     | -3928.175859     | -3928.988073     | 0.977223 | 0.800160 | 2.0322            | -                                  |
| <b>I-3'-D1-T</b>    | -3928.140186     | -3928.954734     | 0.977404 | 0.797902 | 2.1041            | -                                  |

**Table S6.** Computed energies in hartree and vibrational frequency analysis for the first C–H abstraction at C<sup>15</sup> of **I** with **N**, **M1**, and **D1** and associated structures. (CSS = closed shell singlet, OSS = open shell singlet, D = doublet, T = triplet, Q = quintet)

| Structure           | E <sub>BS1</sub> | E <sub>BS2</sub> | H        | G        | <S <sup>2</sup> > | v <sub>i</sub> (cm <sup>-1</sup> ) |
|---------------------|------------------|------------------|----------|----------|-------------------|------------------------------------|
| <b>I-1TS-N-OSS</b>  | -2238.436340     | -2238.930916     | 0.556371 | 0.457453 | 0.5335            | 1735.5i                            |
| <b>I-2-N-T</b>      | -2238.467166     | -2238.964033     | 0.561375 | 0.457848 | 2.0316            | -                                  |
| <b>I-2TS-N-T</b>    | -2238.467865     | -2238.964990     | 0.560016 | 0.460181 | 2.0642            | 111.3i                             |
| <b>I-3-N-T</b>      | -2238.532641     | -2239.034023     | 0.562242 | 0.459867 | 2.0283            | -                                  |
| <b>I-2TS'-N-T</b>   | -2238.451097     | -2238.957426     | 0.559479 | 0.460962 | 2.048             | 182.9i                             |
| <b>I-3'-N-T</b>     | -2238.501327     | -2239.002008     | 0.562984 | 0.462251 | 2.0777            | -                                  |
| <b>I-3TS''-N-T</b>  | -2238.477104     | -2238.976129     | 0.557622 | 0.456586 | 2.0893            | 896.7i                             |
| <b>I-1TS-M1-OSS</b> | -2880.794192     | -2881.395775     | 0.753312 | 0.621377 | 0.5249            | 1553.9i                            |
| <b>I-2-M1-T</b>     | -2880.823478     | -2881.426454     | 0.758148 | 0.621451 | 2.0319            | -                                  |
| <b>I-3-M1-T</b>     | -2880.889285     | -2881.497352     | 0.758823 | 0.625428 | 2.0309            | -                                  |
| <b>I-3'-M1-T</b>    | -2880.852618     | -2881.461362     | 0.759470 | 0.622482 | 2.0791            | -                                  |
| <b>I-1TS-D1-OSS</b> | -3928.073455     | -3928.880188     | 0.970998 | 0.792250 | 0.5638            | 1447.5i                            |
| <b>I-2-D1-T</b>     | -3928.097760     | -3928.907556     | 0.975678 | 0.790854 | 2.0425            | -                                  |
| <b>I-3-D1-T</b>     | -3928.169359     | -3928.980536     | 0.976644 | 0.795455 | 2.0275            | -                                  |
| <b>I-3'-D1-T</b>    | -3928.135084     | -3928.948620     | 0.978022 | 0.798807 | 2.1022            | -                                  |

**Table S7.** Computed energies in hartree and vibrational frequency analysis for the second C–H abstraction at C<sup>11</sup> (after C–H abstraction and O-rebound at C<sup>15</sup>) of **I** with **N**, **M1**, and **D1**. (CSS = closed shell singlet, OSS = open shell singlet, D = doublet, T = triplet, Q = quintet)

| Structure          | E <sub>BS1</sub> | E <sub>BS2</sub> | H        | G        | <S <sup>2</sup> > | v <sub>i</sub> (cm <sup>-1</sup> ) |
|--------------------|------------------|------------------|----------|----------|-------------------|------------------------------------|
| <b>I-3TS-N-T</b>   | -2238.493662     | -2238.997660     | 0.554697 | 0.456301 | 2.7512            | 1371.2i                            |
| <b>I-4-N-Q</b>     | -2238.529978     | -2239.037854     | 0.559327 | 0.457327 | 6.0818            | -                                  |
| <b>I-3-2N-T</b>    | -2643.437717     | -2644.035305     | 0.584069 | 0.471640 | 2.0266            | -                                  |
| <b>I-3TS-2N-T</b>  | -2643.408734     | -2644.007021     | 0.576537 | 0.464319 | 2.5526            | 1856.8i                            |
| <b>I-4-2N-Q</b>    | -2643.448271     | -2644.048391     | 0.581344 | 0.465163 | 6.0553            | -                                  |
| <b>I-5-2N-Q</b>    | -2643.483509     | -2644.087231     | 0.582647 | 0.469723 | 6.0597            | -                                  |
| <b>I-6-2N-Q</b>    | -2643.525081     | -2644.125564     | 0.582382 | 0.471733 | 6.0591            | -                                  |
| <b>I-3TS-M1-T</b>  | -2880.842883     | -2881.455244     | 0.75155  | 0.619916 | 2.7778            | 959.8i                             |
| <b>I-4-M1-Q</b>    | -2880.886605     | -2881.500843     | 0.756451 | 0.622067 | 6.07              | -                                  |
| <b>I-3-2M1-T</b>   | -3928.172454     | -3928.978929     | 0.977572 | 0.800287 | 2.0319            | -                                  |
| <b>I-3TS-2M1-T</b> | -3928.146475     | -3928.957375     | 0.969760 | 0.791322 | 2.6289            | 1582.2i                            |
| <b>I-4-2M1-Q</b>   | -3928.184667     | -3928.998959     | 0.974969 | 0.794385 | 6.0674            | -                                  |
| <b>I-5-2M1-Q</b>   | -3928.204772     | -3929.021862     | 0.975544 | 0.794489 | 6.151             | -                                  |
| <b>I-6-2M1-Q</b>   | -3928.251490     | -3929.066157     | 0.975944 | 0.798720 | 6.063             | -                                  |
| <b>I-3TS-D1-T</b>  | -3928.134618     | -3928.947759     | 0.969186 | 0.789293 | 2.7715            | 1015.1i                            |
| <b>I-4-D1-Q</b>    | -3928.170177     | -3928.986765     | 0.973858 | 0.789598 | 6.0847            | -                                  |
| <b>I-3-2D1-T</b>   | -6022.739316     | -6023.957779     | 1.413915 | 1.146519 | 2.0303            | -                                  |
| <b>I-3TS-2D1-T</b> | -6022.714449     | -6023.934259     | 1.405887 | 1.136638 | 2.6236            | 1705.3i                            |
| <b>I-4-2D1-Q</b>   | -6022.753172     | -6023.975112     | 1.410699 | 1.137847 | 6.0647            | -                                  |
| <b>I-5-2D1-Q</b>   | -6022.772700     | -6023.997120     | 1.412321 | 1.143303 | 6.1195            | -                                  |
| <b>I-6-2D1-Q</b>   | -6022.803384     | -6024.029491     | 1.412153 | 1.142033 | 6.0621            | -                                  |

**Table S8.** Computed energies in hartree and vibrational frequency analysis for the second C–H abstraction at C<sup>11</sup> (after C–H abstraction and OH-rebound at C<sup>15</sup>) of **I** with **N**, **M1**, and **D1**. (CSS = closed shell singlet, OSS = open shell singlet, D = doublet, T = triplet, Q = quintet).

| Structure    | E <sub>BS1</sub> | E <sub>BS2</sub> | H        | G        | <S <sup>2</sup> > | v <sub>i</sub> (cm <sup>-1</sup> ) |
|--------------|------------------|------------------|----------|----------|-------------------|------------------------------------|
| I-3TS'-N-T   | -2238.480161     | -2238.983552     | 0.555470 | 0.456418 | 2.6817            | 1237.1i                            |
| I-4'-N-Q     | -2238.521255     | -2239.026633     | 0.560497 | 0.456885 | 6.0817            | -                                  |
| I-5'-N-Q     | -2238.572263     | -2239.025723     | 0.560007 | 0.459035 | 6.0647            | -                                  |
| I-6'-N-Q     | -2238.511371     | -2239.088151     | 0.559907 | 0.460543 | 6.0971            | -                                  |
| I-3'-2N-T    | -2643.437729     | -2644.033291     | 0.584149 | 0.471724 | 2.0692            | -                                  |
| I-3TS'-2N-T  | -2643.394612     | -2643.992969     | 0.575101 | 0.462082 | 2.0566            | 712.2i                             |
| I-4'-2N-Q    | -2643.462847     | -2644.061261     | 0.582141 | 0.469919 | 6.0602            | -                                  |
| I-5'-2N-Q    | -2643.522886     | -2644.124855     | 0.583656 | 0.474133 | 6.0642            | -                                  |
| I-6'-2N-Q    | -2643.519612     | -2644.117991     | 0.583708 | 0.471247 | 6.0714            | -                                  |
| I-3TS'-M1-T  | -2880.837476     | -2881.446625     | 0.752474 | 0.620261 | 2.7054            | 1053.3i                            |
| I-4'-M1-Q    | -2880.876214     | -2881.488394     | 0.757136 | 0.620411 | 6.0851            | -                                  |
| I-5'-M1-Q    | -2880.930426     | -2881.548808     | 0.758454 | 0.623408 | 6.0712            | -                                  |
| I-6'-M1-Q    | -2880.881292     | -2881.497647     | 0.757731 | 0.623852 | 6.0836            | -                                  |
| I-3'-2M1-T   | -3928.157353     | -3928.969176     | 0.977904 | 0.797723 | 2.0617            | -                                  |
| I-3TS'-2M1-T | -3928.139033     | -3928.950995     | 0.968841 | 0.789527 | 2.6365            | 1132.0i                            |
| I-4'-2M1-Q   | -3928.181154     | -3928.993899     | 0.974965 | 0.791857 | 6.0622            | -                                  |
| I-5'-2M1-Q   | -3928.245040     | -3929.061055     | 0.974776 | 0.797933 | 6.0817            | -                                  |
| I-6'-2M1-Q   | -3928.240729     | -3929.055314     | 0.977015 | 0.796788 | 6.0742            | -                                  |

**Table S9.** Computed energies in hartree and vibrational frequency analysis for the second C–H abstraction at C<sup>15</sup> (after C–H abstraction and O-rebound at C<sup>11</sup>) of **I** with **N**, **M1**, and **D1**. (CSS = closed shell singlet, OSS = open shell singlet, D = doublet, T = triplet, Q = quintet)

| Structure   | E <sub>BS1</sub> | E <sub>BS2</sub> | H        | G        | <S <sup>2</sup> > | v <sub>i</sub> (cm <sup>-1</sup> ) |
|-------------|------------------|------------------|----------|----------|-------------------|------------------------------------|
| I-3TS-N-T   | -2238.493510     | -2238.998588     | 0.554160 | 0.452784 | 2.6148            | 1945.6i                            |
| I-4-N-Q     | -2238.532573     | -2239.039194     | 0.559324 | 0.455893 | 6.071             | -                                  |
| I-3-2N-T    | -2643.441896     | -2644.036397     | 0.583630 | 0.469882 | 2.0264            | -                                  |
| I-3TS-2N-T  | -2643.415955     | -2644.011128     | 0.577037 | 0.467607 | 2.5775            | 1758.2i                            |
| I-4-2N-Q    | -2643.448895     | -2644.046445     | 0.581984 | 0.467502 | 6.0585            | -                                  |
| I-5-2N-Q    | -2643.496854     | -2644.098714     | 0.582525 | 0.472602 | 6.0581            | -                                  |
| I-3TS-M1-T  | -2880.844635     | -2881.453964     | 0.751441 | 0.619287 | 2.5437            | 2328.8i                            |
| I-4-M1-Q    | -2880.881435     | -2881.494039     | 0.756542 | 0.621181 | 6.0811            | -                                  |
| I-3-2M1-T   | -3928.167796     | -3928.978005     | 0.976459 | 0.797014 | 2.0332            | -                                  |
| I-3TS-2M1-T | -3928.139670     | -3928.950896     | 0.968863 | 0.788436 | 2.6093            | 1696.0i                            |
| I-4-2M1-Q   | -3928.177778     | -3928.991427     | 0.974360 | 0.793280 | 6.0693            | -                                  |
| I-5-2M1-Q   | -3928.213402     | -3929.028665     | 0.975770 | 0.797168 | 6.1253            | -                                  |
| I-3TS-D1-T  | -3928.133270     | -3928.947291     | 0.969150 | 0.789813 | 2.8125            | 986.2i                             |
| I-4-D1-Q    | -3928.170031     | -3928.987692     | 0.974127 | 0.793488 | 6.0778            | -                                  |
| I-3-2D1-T   | -6022.734627     | -6023.954253     | 1.414043 | 1.143405 | 2.0313            | -                                  |
| I-3TS-2D1-T | -6022.708425     | -6023.928725     | 1.406196 | 1.137562 | 2.7299            | 1630.2i                            |
| I-4-2D1-Q   | -6022.749507     | -6023.972188     | 1.411627 | 1.140591 | 6.0671            | -                                  |
| I-5-2D1-Q   | -6022.765286     | -6023.990600     | 1.412566 | 1.142528 | 6.122             | -                                  |

**Table S10.** Computed energies in hartree and vibrational frequency analysis for the first C–H abstraction at C<sup>11</sup> and C<sup>15</sup> of **II** with **N**, **M1**, and **D1** and associated structures. (CSS = closed shell singlet, OSS = open shell singlet, D = doublet, T = triplet, Q = quintet)

| Structure            | E <sub>BS1</sub> | E <sub>BS2</sub> | H        | G        | <S <sup>2</sup> > | $\nu_i$ (cm <sup>-1</sup> ) |
|----------------------|------------------|------------------|----------|----------|-------------------|-----------------------------|
| C <sup>11</sup> -H   |                  |                  |          |          |                   |                             |
| <b>II-1-N-CSS</b>    | -2443.831462     | -2444.378921     | 0.562319 | 0.456783 | -                 | -                           |
| <b>II-1TS-N-OSS</b>  | -2443.802317     | -2444.351250     | 0.554681 | 0.448666 | 0.6259            | 1771.1i                     |
| <b>II-2-N-T</b>      | -2443.840488     | -2444.391031     | 0.560025 | 0.452537 | 2.0288            | -                           |
| <b>II-1-M1-CSS</b>   | -3086.185765     | -3086.840675     | 0.759120 | 0.621095 | -                 | -                           |
| <b>II-1TS-M1-OSS</b> | -3086.159082     | -3086.814996     | 0.751864 | 0.614398 | 0.6532            | 1435.5i                     |
| <b>II-2-M1-T</b>     | -3086.198996     | -3086.856123     | 0.756666 | 0.617836 | 2.0322            | -                           |
| <b>II-1-D1-CSS</b>   | -4133.474370     | -4134.332741     | 0.976760 | 0.794836 | -                 | -                           |
| <b>II-1TS-D1-OSS</b> | -4133.449194     | -4134.309653     | 0.969698 | 0.789096 | 0.6496            | 1393.6i                     |
| <b>II-2-D1-T</b>     | -4133.485440     | -4134.347125     | 0.974606 | 0.791859 | 2.043             | -                           |
| C <sup>15</sup> -H   |                  |                  |          |          |                   |                             |
| <b>II-1TS-N-OSS</b>  | -2443.804028     | -2444.353158     | 0.554801 | 0.449466 | 0.5202            | 1735.6i                     |
| <b>II-2-N-T</b>      | -2443.827232     | -2444.380267     | 0.559748 | 0.450583 | 2.0329            | -                           |
| <b>II-1TS-M1-OSS</b> | -3086.162246     | -3086.818676     | 0.751783 | 0.615123 | 0.5574            | 1508.1i                     |
| <b>II-2-M1-T</b>     | -3086.187515     | -3086.846426     | 0.756526 | 0.612892 | 2.0352            | -                           |
| <b>II-1TS-D1-OSS</b> | -4133.450477     | -4134.310189     | 0.969731 | 0.790319 | 0.5876            | 1435.7i                     |
| <b>II-2-D1-T</b>     | -4133.475146     | -4134.337880     | 0.974253 | 0.789580 | 2.0378            | -                           |

**Table S11.** Computed energies in hartree and vibrational frequency analysis for the first C–H abstraction at C<sup>11</sup>, C<sup>15</sup>-H<sup>a</sup> and C<sup>15</sup>-H<sup>b</sup> of **III** with **N**, **M1**, and **M2** and associated structures. (CSS = closed shell singlet, OSS = open shell singlet, D = doublet, T = triplet, Q = quintet)

| Structure                       | E <sub>BS1</sub> | E <sub>BS2</sub> | H        | G        | <S <sup>2</sup> > | $\nu_i$ (cm <sup>-1</sup> ) |
|---------------------------------|------------------|------------------|----------|----------|-------------------|-----------------------------|
| C <sup>11</sup> -H              |                  |                  |          |          |                   |                             |
| <b>III-1-N-CSS</b>              | -2404.510513     | -2405.050746     | 0.532441 | 0.429035 | -                 | -                           |
| <b>III-1TS-N-OSS</b>            | -2404.481898     | -2405.023461     | 0.525047 | 0.421651 | 0.6289            | 1784.6i                     |
| <b>III-2-N-T</b>                | -2404.517292     | -2405.061484     | 0.530105 | 0.425980 | 2.0313            | -                           |
| <b>III-1-M1-CSS</b>             | -3046.863118     | -3047.510444     | 0.729269 | 0.592449 | -                 | -                           |
| <b>III-1TS-M1-OSS</b>           | -3046.837587     | -3047.486037     | 0.722022 | 0.588167 | 0.6571            | 1487.6i                     |
| <b>III-2-M1-T</b>               | -3046.873583     | -3047.522868     | 0.727030 | 0.590343 | 2.0318            | -                           |
| <b>III-1-M2-CSS</b>             | -3090.662243     | -3091.339963     | 1.067542 | 0.911615 | -                 | -                           |
| <b>III-1TS-M2-OSS</b>           | -3090.636535     | -3091.315096     | 1.059896 | 0.906350 | 0.6196            | 1600.7i                     |
| <b>III-2-M2-T</b>               | -3090.673165     | -3091.352474     | 1.065631 | 0.911326 | 2.0313            | -                           |
| C <sup>15</sup> -H <sup>a</sup> |                  |                  |          |          |                   |                             |
| <b>III-1TS-N-OSS</b>            | -2404.480391     | -2405.022234     | 0.525168 | 0.423786 | 0.5212            | 1864.6i                     |
| <b>III-2-N-T</b>                | -2404.502364     | -2405.048250     | 0.530037 | 0.423900 | 2.0345            | -                           |
| <b>III-1TS-M1-OSS</b>           | -3046.838201     | -3047.486475     | 0.722115 | 0.587561 | 0.5533            | 1714.9i                     |
| <b>III-2-M1-T</b>               | -3046.860007     | -3047.511640     | 0.726669 | 0.584866 | 2.0348            | -                           |
| <b>III-1TS-M2-OSS</b>           | -3090.638069     | -3091.316577     | 1.060472 | 0.907227 | 0.5151            | 1759.6i                     |
| <b>III-2-M2-T</b>               | -3090.656717     | -3091.339014     | 1.065671 | 0.907402 | 2.0354            | -                           |
| C <sup>15</sup> -H <sup>b</sup> |                  |                  |          |          |                   |                             |
| <b>III-1-N-CSS</b>              | -2404.511246     | -2405.050207     | 0.532337 | 0.430406 | -                 | -                           |
| <b>III-1TS-N-OSS</b>            | -2404.478769     | -2405.020039     | 0.524959 | 0.424656 | 0.5313            | 1951.7i                     |
| <b>III-2-N-T</b>                | -2404.511643     | -2405.054074     | 0.530676 | 0.425588 | 2.0329            | -                           |
| <b>III-1-M1-CSS</b>             | -3046.853665     | -3047.501616     | 0.729061 | 0.592489 | -                 | -                           |
| <b>III-1TS-M1-OSS</b>           | -3046.818896     | -3047.469189     | 0.721862 | 0.586588 | 0.6334            | 1786.7i                     |
| <b>III-2-M1-T</b>               | -3046.847206     | -3047.500442     | 0.726705 | 0.586694 | 2.0345            | -                           |
| <b>III-1-M2-CSS</b>             | -3090.655036     | -3091.331627     | 1.067779 | 0.913744 | -                 | -                           |
| <b>III-1TS-M2-OSS</b>           | -3090.621822     | -3091.299705     | 1.060288 | 0.908186 | 0.4966            | 1920.6i                     |
| <b>III-2-M2-T</b>               | -3090.653258     | -3091.333391     | 1.065820 | 0.909332 | 2.0337            | -                           |



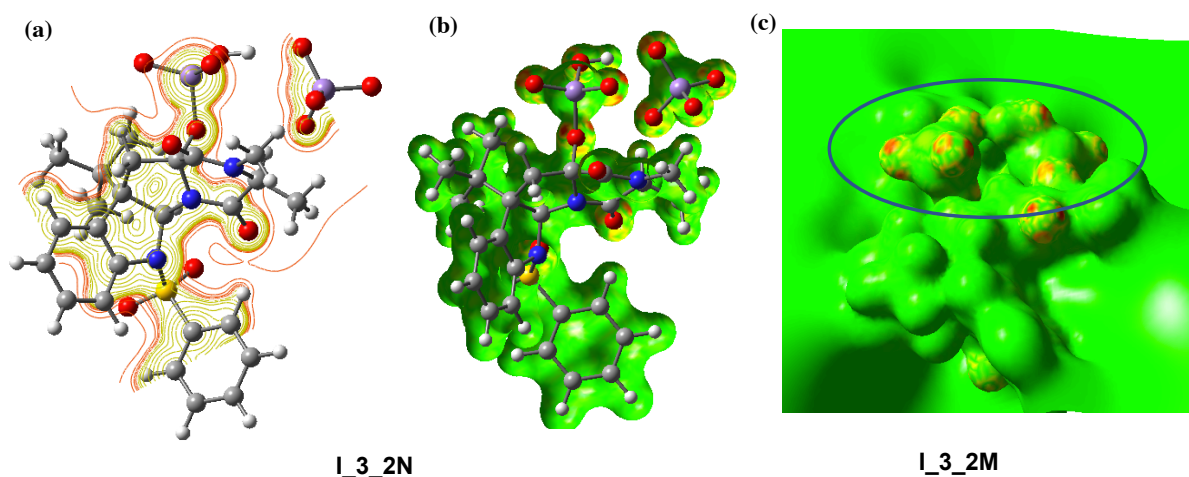

**Figure S9.** (a) Contour plot and (b) electrostatic potential map of the **I\_3\_2N** intermediate, showing no positive interaction between the  $\text{MnO}_4$ -units, and (c) electrostatic potential map of the **I\_3\_2M** intermediate, showing attractive interaction between the  $\text{MnO}_4$ -units.

## 7. References

- Gardner, K. A.; Kuehnert, L. L.; Mayer, J. M. Hydrogen Atom Abstraction by Permanganate: Oxidations of Arylalkanes in Organic Solvents. *Inorg. Chem.* **1997**, *36*, 2069-2078.
- Ghosh, A.; Taylor, P. R. High-Level Ab Initio Calculations on the Energetics of Low-Lying Spin States of Biologically Relevant Transition Metal Complexes: First Progress Report. *Curr. Opin. Chem. Biol.* **2003**, *7*, 113-124.
- Yang, T. H.; Quesne, M. G.; Neu, H. M.; Reinhard, F. G. C.; Goldberg, D. P.; de Visser, S. P. Singlet Versus Triplet Reactivity in an Mn(V)-Oxo Species: Testing Theoretical Predictions against Experimental Evidence. *J. Am. Chem. Soc.* **2016**, *138*, 12375-12386.
- Creary, X.; Butchko, M. A. Beta-Trimethylsilyl Cyclopropylcarbenes. *J. Org. Chem.* **2001**, *66*, 1115-1121.
- Hay, P. J.; Wadt, W. R. Abinitio Effective Core Potentials for Molecular Calculations - Potentials for the Transition-Metal Atoms Sc to Hg. *J. Chem. Phys.* **1985**, *82*, 270-283.
- Hay, P. J.; Wadt, W. R. Abinitio Effective Core Potentials for Molecular Calculations - Potentials for K to Au Including the Outermost Core Orbitals. *J. Chem. Phys.* **1985**, *82*, 299-310.
- Wadt, W. R.; Hay, P. J. Abinitio Effective Core Potentials for Molecular Calculations - Potentials for Main Group Elements Na to Bi. *J. Chem. Phys.* **1985**, *82*, 284-298.
- Grimme, S.; Antony, J.; Ehrlich, S.; Krieg, H. A Consistent and Accurate Ab Initio Parametrization of Density Functional Dispersion Correction (DFT-D) for the 94 Elements H-Pu. *J. Chem. Phys.* **2010**, *132*, 154104.
- Cances, E.; Mennucci, B.; Tomasi, J. A New Integral Equation Formalism for the Polarizable Continuum Model: Theoretical Background and Applications to Isotropic and Anisotropic Dielectrics. *J. Chem. Phys.* **1997**, *107*, 3032-3041.
- Mennucci, B.; Tomasi, J. Continuum Solvation Models: A New Approach to the Problem of Solute's Charge Distribution and Cavity Boundaries. *J. Chem. Phys.* **1997**, *106*, 5151-5158.

11. Scalmani, G.; Frisch, M. J. Continuous Surface Charge Polarizable Continuum Models of Solvation. I. General Formalism. *J. Chem. Phys.* **2010**, *132*, 114110-114124.
12. Essafi, S.; Tomasi, S.; Aggarwal, V. K.; Harvey, J. N. Homologation of Boronic Esters with Organolithium Compounds: A Computational Assessment of Mechanism. *J. Org. Chem.* **2014**, *79*, 12148-12158.
